# Supplementary material
Source: PubMed Central journal article supplement (PMC2962488)
Supplement: supp_M110.118901_jbc.M110.118901-1.pdf [file supp_M110.118901_jbc.M110.118901-1.pdf]

## SUPPLEMENTAL FIGURES

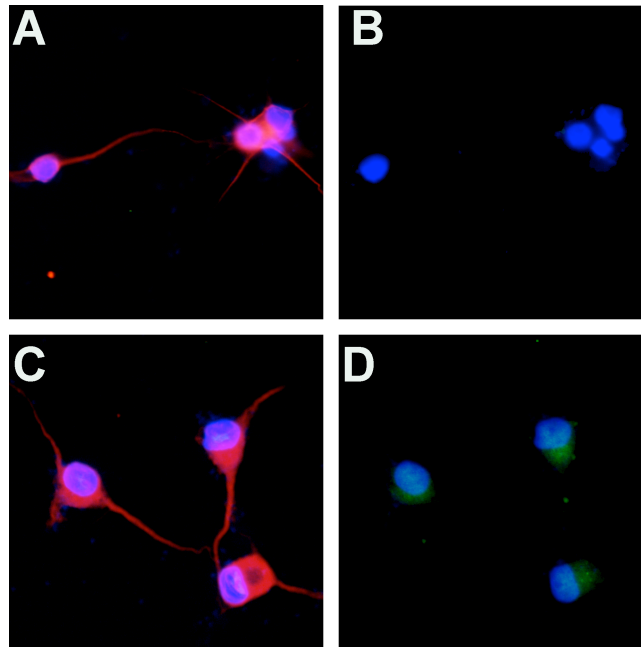

**Supplemental Figure 1. Delivery of SOD to motor neurons.** Motor neurons were plated in a Permax four well chambered slide treated with either Chariot alone (A, B) or Chariot plus 1 $\mu$ g of Cu,Zn SOD<sup>WT</sup> (C, D). After 24h, motor neurons were fixed and stained for the neuronal marker MAP-2 (A, C, Red), and for human SOD (C, D, Green). Human SOD staining in the motor neurons treated with chariot and Cu,Zn SOD<sup>WT</sup> is clearly see (D), while there is no staining in motor neurons incubated with Chariot alone (B). The nuclei were stained with DAPI (Blue)

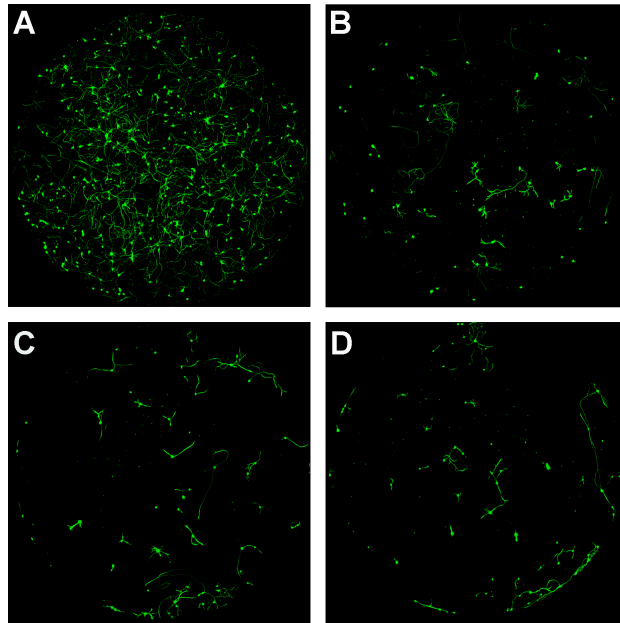

**Supplemental Figure 2. Representative Flash Cytometer images.** Motor neurons incubated by 24 hs previous to incubation with Chariot (A, B) or Chariot supplemented with Zn-deficient SOD<sup>D83S</sup> (C) or Zn-deficient SOD<sup>D83S</sup> plus Cu,Zn SOD<sup>WT</sup> (D) in Optimem for one hour after, before addition of the culture media supplemented with (A) or without (B) trophic factors. Twenty-four hr later the cells were stained with Casein.AM for 1 hr and hemoglobin added as a quenching agent, before the images were taken using a Flash Cytometer. Each image represents 1 well from a 96 well plate.
